# Supplementary material for: Tuning the magnetic properties of van der Waals Fe3GaTe2 crystals by Co doping
Source: Royal Society of Chemistry journal article supplement (doi:10.1039/d4cp01573h), 2024-01-01
Supplement: d4cp01573h2.pdf [file d4cp01573h2.pdf]

# Supporting Information

## Tuning the magnetic properties of van der Waals $\text{Fe}_3\text{GaTe}_2$ crystals by Co doping

Jie Yu,<sup>a</sup> Wen Jin,<sup>a</sup> Gaojie Zhang,<sup>a</sup> Hao Wu,<sup>a</sup> Bichen Xiao,<sup>a</sup> Li Yang<sup>a</sup> and

Haixin Chang<sup>\*abcd</sup>

- a. State Key Laboratory of Material Processing and Die & Mold Technology, School of Materials Science and Engineering, Huazhong University of Science and Technology, Wuhan 430074, China
- b. Wuhan National High Magnetic Field Center and Institute for Quantum Science and Engineering, Huazhong University of Science and Technology, Wuhan 430074, China
- c. Shenzhen R&D Center of Huazhong University of Science and Technology, Shenzhen 518000, China
- d. Liuzhou Key Laboratory of New Energy Vehicle Power Lithium Battery, School of Electronic Engineering, Guangxi University of Science and Technology, LiuZhou 545006, China

\* E-mail: hxchang@hust.edu.cn

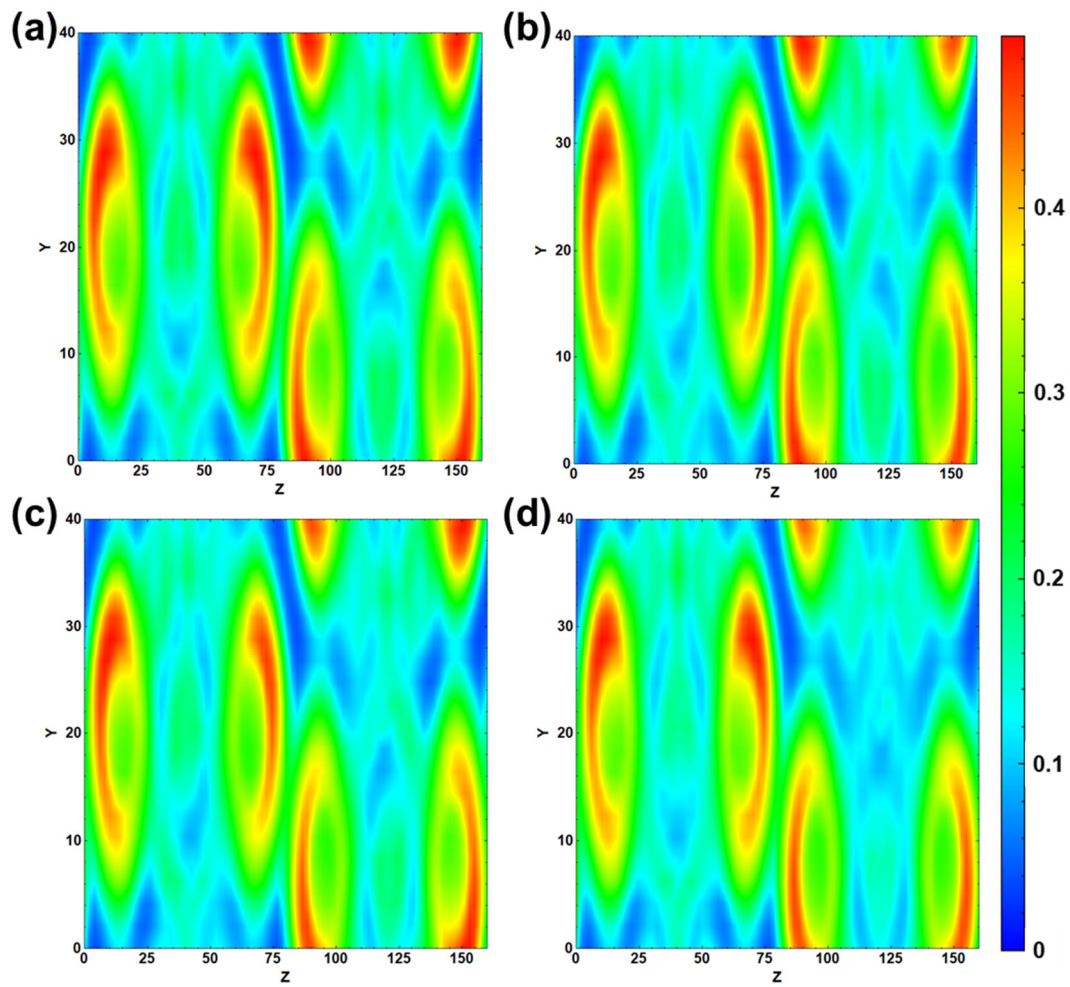

**Fig. S1.** The electron localization function (ELF) for FM-state (a) FGaT, (b) 2Co-1, (c) 2Co-2 and (d) AFM-state 2Co-3.

**Table S1.** Calculated magnetic moments for Fe1, Fe2 and averaged (Avg.) magnetic moments for bulk  $\text{Fe}_3\text{GaTe}_2$  from LDA and GGA functionals along with the experimental (Exp.) data.

|                            | LDA    | GGA    | Exp. |
|----------------------------|--------|--------|------|
| Fe1 ( $\mu_B$ )            | 1.8895 | 2.2447 | -    |
| Fe2 ( $\mu_B$ )            | 1.3761 | 1.5002 | -    |
| Avg. ( $\mu_B/\text{Fe}$ ) | 1.7184 | 1.9965 | 1.68 |
| Error (%)                  | 2.28   | 18.84  | -    |
